# Supplementary material for: The RAVEN Toolbox and Its Use for Generating a Genome-scale Metabolic Model for Penicillium chrysogenum
Source: PubMed Central journal article supplement (PMC3605104; doi:10.1371/journal.pcbi.1002980), 2013-03-21
Supplement: pcbi.1002980.s002.pdf [file pcbi.1002980.s002.pdf]

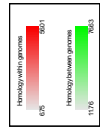

| Genus                     | Genome Size (Mb)     | Protein Homology (%) |
|---------------------------|----------------------|----------------------|
| Mucor circinelloides      | 4407/10300           | 37.5%                |
| CBE27.49                  | 10300 genes, 3.70 Mb |                      |
| Phycomyces blakesleeanus  | 6658/10300           | 64.5%                |
| NRL1555                   | 14702 genes, 4p      |                      |
| Rhizopus oryzae           | 6658/10300           | 64.5%                |
| RA-99-880                 | 17467 genes, 4p      |                      |
| Ashbya gossypii           | 6039/10300           | 58.6%                |
| ATCC 10895                | 4720 genes, 2p       |                      |
| Candida glabrata          | 6039/10300           | 58.6%                |
| CBS 138                   | 5111 genes, 2p       |                      |
| Saccharomyces cerevisiae  | 6039/10300           | 58.6%                |
| SC288c                    | 5880 genes, 2p       |                      |
| Kluyveromyces lactis      | 6039/10300           | 58.6%                |
| NRL Y-1140                | 5300 genes, 2p       |                      |
| Debaryomyces hansenii     | 6039/10300           | 58.6%                |
| CBS67                     | 6524 genes, 2p       |                      |
| Pichia stipitis           | 6039/10300           | 58.6%                |
| CBS6054                   | 5818 genes, 2p       |                      |
| Yarrowia lipolytica       | 6039/10300           | 58.6%                |
| QAB122                    | 6417 genes, 2p       |                      |
| Schizosaccharomyces pombe | 6039/10300           | 58.6%                |
| 972h                      | 5003 genes, 2p       |                      |
| Neurospora crassa         | 6039/10300           | 58.6%                |
| CF74A                     | 9524 genes, 2p       |                      |
| Ustilago maydis           | 6039/10300           | 58.6%                |
| 521                       | 6538 genes, 2p       |                      |
| Trichoderma reesei        | 6039/10300           | 58.6%                |
| QM6a                      | 9144 genes, 2p       |                      |
| Aspergillus oryzae        | 6039/10300           | 58.6%                |
| RB-40                     | 12074 genes, 2p      |                      |
| Aspergillus niger         | 6039/10300           | 58.6%                |
| ATC 1015                  | 11197 genes, 2p      |                      |
| Aspergillus fumigatus     | 6039/10300           | 58.6%                |
| AF293                     | 9025 genes, 2p       |                      |
| Aspergillus nidulans      | 6039/10300           | 58.6%                |
| FGSC44                    | 7082 genes, 2p       |                      |
| Penicillium chrysogenum   | 6039/10300           | 58.6%                |
| Wilson54-1255             | 12811 genes, 2p      |                      |

**Figure S1.** Proteome comparison of genomes in *Fungi*. ALR (the ratio of alignment length to query sequence length): >0.50, identity: >0.40. The red shades refer to protein homology that can be found within a genome (paralog). The green shades refer to protein homology that can be found between two genomes (ortholog).
