# Supplementary material for: The RAVEN Toolbox and Its Use for Generating a Genome-scale Metabolic Model for Penicillium chrysogenum
Source: PubMed Central journal article supplement (PMC3605104; doi:10.1371/journal.pcbi.1002980), 2013-03-21
Supplement: pcbi.1002980.s003.pdf [file pcbi.1002980.s003.pdf]

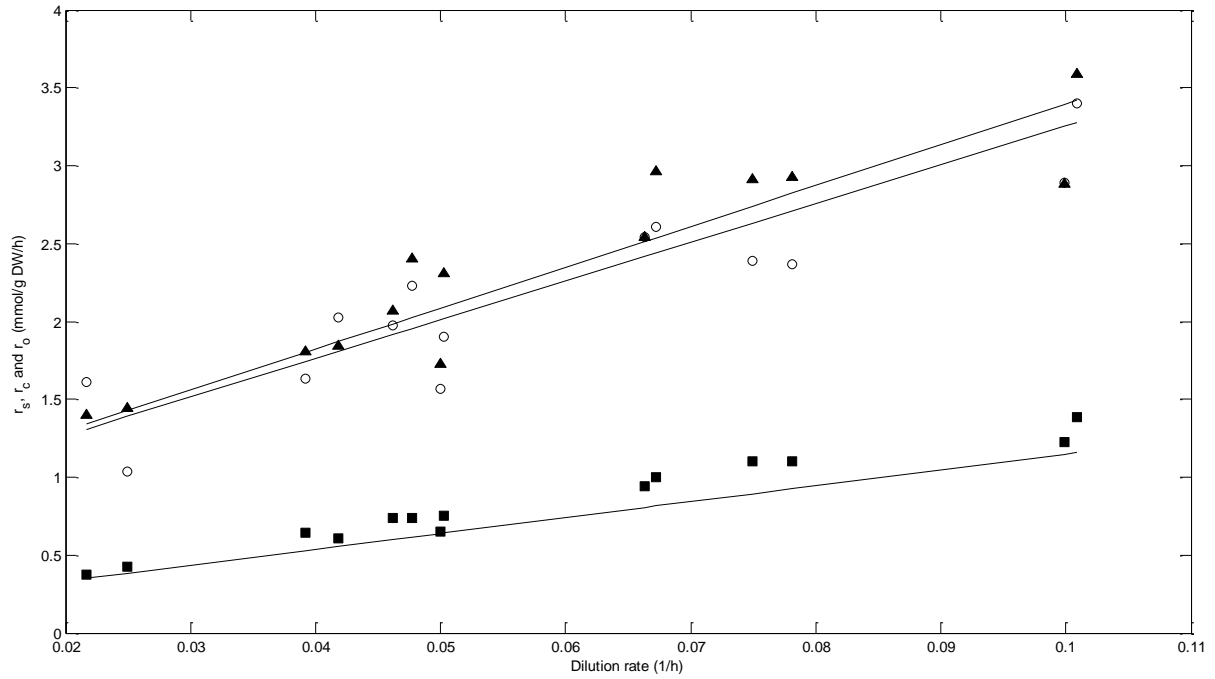

**Figure S2.** Agreement of model simulations with experimental fermentation data. Data from glucose-limited chemostat with defined medium containing glucose, inorganic salts and phenoxyacetate [1].

## References

1. Nielsen JH (1995) Physiological engineering aspects of penicillium chrysogenum. Denmark: Polyteknisk forlag. x, 223 p. p.
