# Supplementary material for: The RAVEN Toolbox and Its Use for Generating a Genome-scale Metabolic Model for Penicillium chrysogenum
Source: PubMed Central journal article supplement (PMC3605104; doi:10.1371/journal.pcbi.1002980), 2013-03-21
Supplement: pcbi.1002980.s004.pdf [file pcbi.1002980.s004.pdf]

**Table S1.** Reactions which were excluded from the general KEGG model after running *removeBadRxns*. 72 reactions were unbalanced, general or polymer reactions and were therefore correctly removed. 7 reactions were correct in KEGG, but were removed because they lacked metabolite composition (it is a setting in *removeBadRxns* whether it is allowed to remove such reactions).

| <b>Reaction ID</b> | <b>Reaction status</b>                    |
|--------------------|-------------------------------------------|
| R00019             | Correct reaction with missing information |
| R00296             | General                                   |
| R00305             | General                                   |
| R00459             | Unbalanced                                |
| R00476             | General                                   |
| R00785             | Correct reaction with missing information |
| R00798             | General                                   |
| R00861             | General                                   |
| R01120             | General                                   |
| R01303             | General                                   |
| R01350             | General                                   |
| R02110             | Polymer                                   |
| R02550             | Unbalanced                                |
| R02663             | General                                   |
| R02818             | Unbalanced                                |
| R03141             | Unbalanced                                |
| R03172             | General                                   |
| R03532             | General                                   |
| R03533             | General                                   |
| R03536             | General                                   |
| R03569             | Unbalanced                                |
| R04098             | General                                   |
| R04644             | General                                   |
| R05325             | Unbalanced                                |
| R05472             | Unbalanced                                |
| R05476             | Unbalanced                                |
| R05539             | Unbalanced                                |
| R05666             | Unbalanced                                |
| R05745             | General                                   |
| R05875             | Correct reaction with missing information |
| R06061             | Polymer                                   |
| R06084             | Polymer                                   |
| R06103             | Polymer                                   |
| R06113             | Polymer                                   |
| R06159             | Polymer                                   |
| R06185             | Polymer                                   |
| R06186             | Polymer                                   |
| R06333             | Unbalanced                                |
| R06334             | Unbalanced                                |
| R06445             | Unbalanced                                |
| R06565             | Unbalanced                                |
| R06579             | Unbalanced                                |
| R06580             | Unbalanced                                |
| R06584             | Unbalanced                                |
| R06612             | Polymer                                   |
| R06635             | Unbalanced                                |
| R06722             | Polymer                                   |
| R06727             | Unbalanced                                |
| R06745             | Unbalanced                                |
| R06955             | Unbalanced                                |
| R06959             | Unbalanced                                |
| R07157             | Correct reaction with missing information |
| R07436             | Unbalanced                                |
| R07482             | Unbalanced                                |

---

|        |                                           |
|--------|-------------------------------------------|
| R07738 | Unbalanced                                |
| R07810 | Polymer                                   |
| R07943 | Unbalanced                                |
| R07945 | Unbalanced                                |
| R08011 | Unbalanced                                |
| R08122 | Unbalanced                                |
| R08147 | Unbalanced                                |
| R08456 | Unbalanced                                |
| R08539 | Correct reaction with missing information |
| R08567 | Correct reaction with missing information |
| R08586 | Unbalanced                                |
| R08812 | Unbalanced                                |
| R09066 | Unbalanced                                |
| R09071 | Correct reaction with missing information |
| R09089 | Unbalanced                                |
| R09093 | Unbalanced                                |
| R09142 | Unbalanced                                |
| R09145 | Unbalanced                                |
| R09146 | Unbalanced                                |
| R09147 | Unbalanced                                |
| R09149 | Unbalanced                                |
| R09151 | Unbalanced                                |
| R09210 | Unbalanced                                |
| R09218 | Unbalanced                                |
| R09317 | General                                   |

---
