# Supplementary material for: The RAVEN Toolbox and Its Use for Generating a Genome-scale Metabolic Model for Penicillium chrysogenum
Source: PubMed Central journal article supplement (PMC3605104; doi:10.1371/journal.pcbi.1002980), 2013-03-21
Supplement: pcbi.1002980.s005.pdf [file pcbi.1002980.s005.pdf]

**Table S2.** Comparison of an automatically reconstructed model for *S. cerevisiae* to a published model of the same organism (iIN800) in terms of included genes [1]. The table shows the genes that are unique to either the automatically reconstructed or the manually reconstructed model, and a classification of the genes into groups that reflect how well suited they are for being included in a GEM. Genes labeled as “enzymatic” should be included, while all other groups should probably be excluded. For iIN800 some enzymatic genes are further classified as “polymer”, “lipid” or “membrane”. These are parts of metabolism where an automatically generated model from KEGG would have particular drawbacks compared to a manually reconstructed model. “Polymer” corresponds mainly to genes involved in sugar polymer metabolism, which is an area that contains many unbalanced reactions in KEGG. Such reactions were excluded in the validation, so the corresponding genes could not be included. The same is true for “lipid”, where the reactions contain many general metabolites, which also results in excluded reactions. “Membrane” corresponds to reactions which depend on any one metabolite in different compartments. This compartmentalization information is absent in KEGG so such a reaction would read, for example,  $A + B \Rightarrow A + C$ . “A” here might mean “A(cytosolic)” and “A(mitochondrial)”, but since that information is missing, the equation becomes incorrect and it is therefore excluded. “Signaling” corresponds to proteins which are primarily involved in signaling, even though they might have an enzymatic capability.

| <b>Only in automatically reconstructed</b> | <b>Protein type</b> | <b>Only in iIN800</b> | <b>Protein type</b>   |
|--------------------------------------------|---------------------|-----------------------|-----------------------|
| YAL039C                                    | enzymatic           | Q0045                 | enzymatic (membrane)  |
| YAL060W                                    | enzymatic           | YAR073W               | nonfunctional         |
| YAL061W                                    | enzymatic           | YAR075W               | nonfunctional         |
| YBL064C                                    | enzymatic           | YBL099W               | enzymatic (membrane)  |
| YBL080C                                    | enzymatic           | YBR011C               | enzymatic             |
| YBL082C                                    | enzymatic           | YBR023C               | enzymatic (polymer)   |
| YBR004C                                    | enzymatic           | YBR034C               | signaling             |
| YBR070C                                    | enzymatic           | YBR036C               | enzymatic (polymer)   |
| YBR092C                                    | enzymatic           | YBR038W               | enzymatic (polymer)   |
| YBR093C                                    | enzymatic           | YBR184W               | nonfunctional         |
| YBR110W                                    | enzymatic           | YBR199W               | enzymatic (polymer)   |
| YBR111C                                    | enzymatic           | YBR284W               | nonfunctional         |
| YBR213W                                    | enzymatic           | YCR024C-A             | nonenzymatic          |
| YBR221C                                    | enzymatic           | YDL040C               | signaling             |
| YBR229C                                    | enzymatic           | YDL085W               | enzymatic (membrane)  |
| YBR243C                                    | enzymatic           | YDL090C               | signaling             |
| YBR245C                                    | nonenzymatic        | YDL100C               | signaling             |
| YCL009C                                    | enzymatic           | YDR007W               | possible strain issue |
| YCL017C                                    | enzymatic           | YDR072C               | enzymatic (polymer)   |
| YCL052C                                    | enzymatic           | YDR261C               | enzymatic (polymer)   |
| YCR105W                                    | enzymatic           | YDR284C               | enzymatic (lipid)     |
| YCR107W                                    | enzymatic           | YDR315C               | enzymatic             |
| YDL036C                                    | enzymatic           | YDR399W               | enzymatic             |
| YDL080C                                    | enzymatic           | YDR503C               | enzymatic (lipid)     |
| YDL141W                                    | enzymatic           | YEL017C-A             | nonenzymatic          |
| YDL236W                                    | enzymatic           | YEL024W               | enzymatic (membrane)  |
| YDL238C                                    | enzymatic           | YEL047C               | enzymatic             |
| YDL243C                                    | enzymatic           | YER003C               | enzymatic             |
| YDL246C                                    | enzymatic           | YER024W               | enzymatic (membrane)  |
| YDR009W                                    | signaling           | YFL045C               | nonenzymatic          |
| YDR036C                                    | enzymatic           | YFR015C               | enzymatic (polymer)   |
| YDR148C                                    | enzymatic           | YFR055W               | enzymatic             |
| YDR173C                                    | enzymatic           | YGL008C               | nonenzymatic          |

|         |              |         |                      |
|---------|--------------|---------|----------------------|
| YDR178W | enzymatic    | YGL248W | signaling            |
| YDR196C | enzymatic    | YGR032W | enzymatic (polymer)  |
| YDR248C | unknown      | YGR147C | signaling            |
| YDR302W | enzymatic    | YGR282C | enzymatic (polymer)  |
| YDR305C | enzymatic    | YHR042W | enzymatic            |
| YDR368W | enzymatic    | YHR067W | enzymatic (lipid)    |
| YDR380W | enzymatic    | YHR068W | enzymatic            |
| YDR402C | enzymatic    | YIL073C | nonenzymatic         |
| YDR428C | enzymatic    | YIL167W | nonfunctional        |
| YDR437W | enzymatic    | YJL070C | putative enzyme      |
| YDR440W | signaling    | YJL126W | enzymatic            |
| YDR453C | enzymatic    | YJR051W | enzymatic            |
| YDR465C | signaling    | YJR066W | signaling            |
| YDR487C | enzymatic    | YJR073C | enzymatic (lipid)    |
| YDR516C | unknown      | YJR133W | enzymatic            |
| YDR539W | enzymatic    | YKL004W | enzymatic (lipid)    |
| YEL029C | kinase       | YKL055C | enzymatic (lipid)    |
| YEL038W | enzymatic    | YKL132C | putative enzyme      |
| YEL042W | enzymatic    | YKL192C | nonenzymatic         |
| YEL070W | unknown      | YKL203C | signaling            |
| YER001W | enzymatic    | YKL212W | signaling            |
| YER005W | enzymatic    | YLL012W | enzymatic (lipid)    |
| YER141W | enzymatic    | YLR020C | enzymatic (lipid)    |
| YER168C | enzymatic    | YLR172C | signaling            |
| YER183C | enzymatic    | YLR195C | signaling            |
| YFL060C | unknown      | YLR258W | enzymatic (polymer)  |
| YFL061W | unknown      | YLR284C | enzymatic (lipid)    |
| YFR044C | enzymatic    | YLR300W | enzymatic (polymer)  |
| YGL022W | nonenzymatic | YLR342W | enzymatic (polymer)  |
| YGL027C | enzymatic    | YML120C | enzymatic (membrane) |
| YGL038C | enzymatic    | YMR006C | enzymatic (lipid)    |
| YGL047W | enzymatic    | YMR008C | enzymatic (lipid)    |
| YGL065C | enzymatic    | YMR145C | enzymatic (membrane) |
| YGL142C | enzymatic    | YMR267W | enzymatic            |
| YGL154C | enzymatic    | YMR272C | enzymatic (lipid)    |
| YGL184C | enzymatic    | YMR306W | enzymatic (polymer)  |
| YGL257C | enzymatic    | YMR316W | nonfunctional        |
| YGR010W | enzymatic    | YNL192W | enzymatic (polymer)  |
| YGR036C | enzymatic    | YNL202W | enzymatic (lipid)    |
| YGR110W | enzymatic    | YNL292W | signaling            |
| YGR180C | enzymatic    | YNL325C | signaling            |
| YGR216C | enzymatic    | YOL011W | enzymatic (lipid)    |
| YGR227W | enzymatic    | YOL065C | enzymatic (lipid)    |
| YGR277C | enzymatic    | YOL136C | enzymatic            |
| YHR011W | enzymatic    | YOR180C | maybe enzyme         |
| YHR033W | unknown      | YOR190W | nonenzymatic         |
| YHR039C | unknown      | YOR221C | enzymatic (lipid)    |
| YHR047C | enzymatic    | YPL036W | nonenzymatic         |
| YHR104W | enzymatic    | YPL053C | enzymatic (polymer)  |
| YHR119W | signaling    | YPL057C | enzymatic (lipid)    |
| YHR179W | enzymatic    | YPL110C | enzymatic (lipid)    |
| YHR201C | enzymatic    | YPL212C | signaling            |

---

|         |                       |         |                     |
|---------|-----------------------|---------|---------------------|
| YHR215W | enzymatic             | YPL266W | signaling           |
| YIL014W | enzymatic             | YPL275W | not in S288C strain |
| YIL043C | enzymatic             | YPL276W | not in S288C strain |
| YIL049W | enzymatic             | YPR021C | nonenzymatic        |
| YIL083C | enzymatic             | YPR026W | enzymatic           |
| YIL099W | enzymatic             | YPR160W | enzymatic (polymer) |
| YIL164C | possible strain issue | YPR176C | signaling           |
| YJL026W | enzymatic             |         |                     |
| YJL045W | enzymatic             |         |                     |
| YJL046W | signaling             |         |                     |
| YJL060W | enzymatic             |         |                     |
| YJL062W | nonenzymatic          |         |                     |
| YJL071W | enzymatic             |         |                     |
| YJL091C | enzymatic             |         |                     |
| YJL097W | enzymatic             |         |                     |
| YJL132W | unknown               |         |                     |
| YJL168C | signaling             |         |                     |
| YJR013W | enzymatic             |         |                     |
| YJR024C | enzymatic             |         |                     |
| YJR069C | enzymatic             |         |                     |
| YJR096W | enzymatic             |         |                     |
| YJR130C | enzymatic             |         |                     |
| YJR131W | enzymatic             |         |                     |
| YJR153W | enzymatic             |         |                     |
| YKL087C | enzymatic             |         |                     |
| YKL088W | enzymatic             |         |                     |
| YKL148C | enzymatic             |         |                     |
| YKL150W | enzymatic             |         |                     |
| YKL157W | enzymatic             |         |                     |
| YKL165C | nonenzymatic          |         |                     |
| YKL215C | enzymatic             |         |                     |
| YKL218C | enzymatic             |         |                     |
| YKR043C | enzymatic             |         |                     |
| YKR066C | enzymatic             |         |                     |
| YKR072C | enzymatic             |         |                     |
| YLL031C | enzymatic             |         |                     |
| YLL041C | enzymatic             |         |                     |
| YLL057C | enzymatic             |         |                     |
| YLL058W | unknown               |         |                     |
| YLR017W | enzymatic             |         |                     |
| YLR070C | enzymatic             |         |                     |
| YLR118C | signaling             |         |                     |
| YLR164W | unknown               |         |                     |
| YLR239C | signaling             |         |                     |
| YLR345W | enzymatic             |         |                     |
| YLR351C | nonenzymatic          |         |                     |
| YLR410W | enzymatic             |         |                     |
| YML028W | enzymatic             |         |                     |
| YML086C | enzymatic             |         |                     |
| YML087C | unknown               |         |                     |
| YML125C | signaling             |         |                     |
| YMR009W | enzymatic             |         |                     |

---

|           |                 |
|-----------|-----------------|
| YMR020W   | enzymatic       |
| YMR095C   | unknown         |
| YMR099C   | enzymatic       |
| YMR118C   | unknown         |
| YMR226C   | enzymatic       |
| YMR278W   | enzymatic       |
| YMR281W   | enzymatic       |
| YMR318C   | enzymatic       |
| YMR323W   | unknown         |
| YNL036W   | enzymatic       |
| YNL038W   | enzymatic       |
| YNL045W   | enzymatic       |
| YNL048W   | enzymatic       |
| YNL168C   | unknown         |
| YNL219C   | enzymatic       |
| YNL274C   | enzymatic       |
| YNL331C   | enzymatic       |
| YNL334C   | putative enzyme |
| YNL335W   | unknown         |
| YNR027W   | enzymatic       |
| YNR030W   | enzymatic       |
| YNR073C   | enzymatic       |
| YOL066C   | enzymatic       |
| YOL143C   | enzymatic       |
| YOL157C   | enzymatic       |
| YOR002W   | enzymatic       |
| YOR067C   | enzymatic       |
| YOR108W   | enzymatic       |
| YOR120W   | enzymatic       |
| YOR125C   | enzymatic       |
| YOR136W   | enzymatic       |
| YOR149C   | enzymatic       |
| YOR175C   | enzymatic       |
| YOR196C   | enzymatic       |
| YOR251C   | nonenzymatic    |
| YOR269W   | nonenzymatic    |
| YOR274W   | enzymatic       |
| YOR303W   | enzymatic       |
| YOR304W   | nonenzymatic    |
| YOR326W   | nonenzymatic    |
| YPL017C   | nonenzymatic    |
| YPL069C   | enzymatic       |
| YPL076W   | enzymatic       |
| YPL082C   | nonenzymatic    |
| YPL096C-A | nonenzymatic    |
| YPL171C   | enzymatic       |
| YPL175W   | enzymatic       |
| YPL206C   | enzymatic       |
| YPL227C   | enzymatic       |
| YPR002W   | enzymatic       |
| YPR073C   | nonenzymatic    |
| YPR118W   | enzymatic       |

---

|         |           |
|---------|-----------|
| YPR127W | unknown   |
| YPR140W | enzymatic |
| YPR184W | enzymatic |

---

## References

1. Nookaew I, Jewett MC, Meechai A, Thammarongtham C, Laoteng K, et al. (2008) The genome-scale metabolic model iIN800 of *Saccharomyces cerevisiae* and its validation: a scaffold to query lipid metabolism. *BMC Syst Biol* 2: 71.
