# Supplementary material for: The RAVEN Toolbox and Its Use for Generating a Genome-scale Metabolic Model for Penicillium chrysogenum
Source: PubMed Central journal article supplement (PMC3605104; doi:10.1371/journal.pcbi.1002980), 2013-03-21
Supplement: pcbi.1002980.s006.pdf [file pcbi.1002980.s006.pdf]

**Table S3.** Metabolites which could be synthesized in the automatically reconstructed *S. cerevisiae* model from minimal media (glucose, phosphate, sulfate, NH<sub>3</sub>, oxygen, 4-aminobenzoate, riboflavin, thiamine, biotin, folate, and nicotinate [1]). Uptake of the carriers carnitine and acyl-carrier protein was allowed for modeling purposes (many compounds are bound to them and therefore net synthesis of these compounds is not possible without them).

---

| <b>KEGG metabolite name</b>                                                          |
|--------------------------------------------------------------------------------------|
| (-)-Ureidoglycolate                                                                  |
| (2E)-Octadecenoyl-CoA                                                                |
| (2R,3S)-3-Isopropylmalate                                                            |
| (2S)-2-Isopropyl-3-oxosuccinate                                                      |
| (3R)-3-Hydroxybutanoyl-[acyl-carrier protein]                                        |
| (3R)-3-Hydroxydecanoyl-[acyl-carrier protein]                                        |
| (3R)-3-Hydroxyoctanoyl-[acyl-carrier protein]                                        |
| (3R)-3-Hydroxypalmitoyl-[acyl-carrier protein]                                       |
| (3R)-3-Hydroxytetradecanoyl-[acyl-carrier protein]                                   |
| (9Z)-Octadecenoic acid                                                               |
| (R)-2,3-Dihydroxy-3-methylbutanoate                                                  |
| (R)-2,3-Dihydroxy-3-methylpentanoate                                                 |
| (R)-2-Hydroxybutane-1,2,4-tricarboxylate                                             |
| (R)-3-Hydroxy-3-methyl-2-oxopentanoate                                               |
| (R)-3-Hydroxydodecanoyl-[acp]                                                        |
| (R)-3-Hydroxyhexanoyl-[acp]                                                          |
| (R)-4'-Phosphopantothenoyl-L-cysteine                                                |
| (R)-5-Diphosphomevalonate                                                            |
| (R)-5-Phosphomevalonate                                                              |
| (R)-Mevalonate                                                                       |
| (R)-Pantoate                                                                         |
| (S)(+)-Allantoin                                                                     |
| (S)-1-Pyrroline-5-carboxylate                                                        |
| (S)-2,3-Epoxy-squalene                                                               |
| (S)-2-Aceto-2-hydroxybutanoate                                                       |
| (S)-2-Acetolactate                                                                   |
| (S)-3-Hydroxy-3-methylglutaryl-CoA                                                   |
| (S)-3-Hydroxyhexadecanoyl-CoA                                                        |
| (S)-3-Methyl-2-oxopentanoic acid                                                     |
| (S)-Dihydroorotate                                                                   |
| (S)-Malate                                                                           |
| (Z)-But-1-ene-1,2,4-tricarboxylate                                                   |
| 1-(2-Carboxyphenylamino)-1-deoxy-D-ribulose 5-phosphate                              |
| 1-(5-Phospho-D-ribosyl)-5-amino-4-imidazolecarboxylate                               |
| 1-(5-Phospho-D-ribosyl)-ATP                                                          |
| 1-(5'-Phosphoribosyl)-5-amino-4-(N-succinocarboxamide)-imidazole                     |
| 1-(5'-Phosphoribosyl)-5-amino-4-imidazolecarboxamide                                 |
| 1-(5'-Phosphoribosyl)-5-formamido-4-imidazolecarboxamide                             |
| 10-Formyltetrahydrofolate                                                            |
| 14-Demethylsterol                                                                    |
| 1D-myo-Inositol 1,3,4,5,6-pentakisphosphate                                          |
| 1D-myo-Inositol 1,4,5,6-tetrakisphosphate                                            |
| 1D-myo-Inositol 1,4-bisphosphate                                                     |
| 1D-myo-Inositol 3-phosphate                                                          |
| 2-(alpha-Hydroxyethyl)thiamine diphosphate                                           |
| 2-(Formamido)-N1-(5'-phosphoribosyl)acetamide                                        |
| 2,3-Bisphospho-D-glycerate                                                           |
| 2,3-Dihydroxy-3-methylbutanoate                                                      |
| 2,5-Diamino-6-(5-phospho-D-ribitylamino)pyrimidin-4(3H)-one                          |
| 2,5-Diamino-6-(5-phospho-D-ribosylamino)pyrimidin-4(3H)-one                          |
| 2,5-Diamino-6-(5'-triphosphoryl-3',4'-trihydroxy-2'-oxopentyl)-amino-4-oxypyrimidine |
| 2,5-Diaminopyrimidine nucleoside triphosphate                                        |
| 2,5-Dioxopentanoate                                                                  |
| 2-Acetolactate                                                                       |

---

2-Amino-3-carboxymuconate semialdehyde  
2-Amino-4-hydroxy-6-(D-erythro-1,2,3-trihydroxypropyl)-7,8-dihydropteridine  
2-Amino-4-hydroxy-6-(erythro-1,2,3-trihydroxypropyl)dihydropteridine triphosphate  
2-Amino-4-hydroxy-6-hydroxymethyl-7,8-dihydropteridine  
2-Amino-7,8-dihydro-4-hydroxy-6-(diphosphoxymethyl)pteridine  
2-Dehydro-3-deoxy-D-arabino-heptonate 7-phosphate  
2-Dehydropantoate  
2-Isopropylmaleate  
2-Keto-D-gluconic acid  
2-Oxoadipate  
2-Oxobutanoate  
2-Oxoglutarate  
2-Phenylacetamide  
2-Phospho-D-glycerate  
2-Phosphoglycolate  
3-(4-Hydroxyphenyl)pyruvate  
3-(Imidazol-4-yl)-2-oxopropyl phosphate  
3',5'-Cyclic AMP  
3',5'-Cyclic GMP  
3-Carboxy-1-hydroxypropyl-ThPP  
3-Dehydroquinate  
3-Dehydroshikimate  
3-Dehydrosphinganine  
3-Fumarylpyruvate  
3-Hydroxy-3-methyl-2-oxobutanoic acid  
3-Hydroxyanthranilate  
3-Hydroxy-L-kynurenine  
3-Hydroxyoctadecanoyl-[acp]  
3-Hydroxyoctadecanoyl-CoA  
3-Keto-4-methylzymosterol  
3-Methyl-2-oxobutanoic acid  
3-Oxoadipyl-CoA  
3-Oxodecanoyl-[acp]  
3-Oxododecanoyl-[acp]  
3-Oxohexadecanoyl-[acp]  
3-Oxohexanoyl-[acp]  
3-Oxoctanoyl-[acp]  
3-Oxopropanoate  
3-Oxostearoyl-[acp]  
3-Oxostearoyl-CoA  
3-Oxotetradecanoyl-[acp]  
3'-Phosphoadenylyl sulfate  
3-Phospho-D-glycerate  
3-Phospho-D-glyceroyl phosphate  
3-Phosphonooxypyruvate  
4-(2-Amino-3-hydroxyphenyl)-2,4-dioxobutanoate  
4-(2-Aminophenyl)-2,4-dioxobutanoate  
4,4-Dimethyl-5alpha-cholesta-8,14,24-trien-3beta-ol  
4alpha-Methylzymosterol  
4alpha-Methylzymosterol-4-carboxylate  
4-Amino-4-deoxychorismate  
4-Aminobenzoate  
4-Aminobutanoate  
4-Phospho-L-aspartate  
5-(5-Phospho-D-ribosylaminoformimino)-1-(5-phosphoribosyl)-imidazole-4-carboxamide  
5,10-Methenyltetrahydrofolate  
5,10-Methylenetetrahydrofolate  
5-Amino-4-imidazolecarboxamide  
5-Amino-6-(1-D-ribitylamino)uracil  
5-Amino-6-(5'-phospho-D-ribitylamino)uracil

---

5-Aminolevulinate  
5-Formyltetrahydrofolate  
5-Methyltetrahydrofolate  
5-O-(1-Carboxyvinyl)-3-phosphoshikimate  
5-Phospho-alpha-D-ribose 1-diphosphate  
5-Phosphoribosylamine  
5'-Phosphoribosylglycinamide  
5'-Phosphoribosyl-N-formylglycinamide  
6,7-Dimethyl-8-(D-ribityl)lumazine  
6-Phospho-D-gluconate  
Acetaldehyde  
Acetate  
Acetoacetyl-[acp]  
Acetoacetyl-CoA  
Acetyl adenylate  
Acetyl-[acyl-carrier protein]  
Acetyl-CoA  
Acyl-carrier protein  
Adenine  
Adenosine  
Adenosine 3',5'-bisphosphate  
Adenylyl sulfate  
ADP  
Allantoate  
all-trans-Decaprenyl diphosphate  
all-trans-Hexaprenyl diphosphate  
alpha,alpha-Trehalose  
alpha,alpha'-Trehalose 6-phosphate  
alpha-D-Galactose 1-phosphate  
alpha-D-Glucose  
alpha-D-Glucose 1,6-bisphosphate  
alpha-D-Glucose 6-phosphate  
alpha-D-Ribose 1-phosphate  
alpha-Isopropylmalate  
Aminoimidazole ribotide  
AMP  
Amylose  
Anthranilate  
ATP  
beta-Alanine  
beta-D-Fructose  
beta-D-Fructose 1,6-bisphosphate  
beta-D-Fructose 2,6-bisphosphate  
beta-D-Fructose 6-phosphate  
beta-D-Glucose  
beta-D-Glucose 6-phosphate  
Biotin  
Biotinyl-5'-AMP  
But-2-enoyl-[acyl-carrier protein]  
Butyryl-[acp]  
Carbamoyl phosphate  
Carbonic acid  
Carnitine  
Carnosine  
CDP  
CDP-ethanolamine  
Chorismate  
Cinnavalininate  
cis-Aconitate  
Citrate

---

CMP  
CO2  
CoA  
Coproporphyrinogen III  
CTP  
Cyanamide  
Cycloartenol  
Cys-Gly  
Cystathionine  
Cytidine  
Cytosine  
D-4'-Phosphopantothenate  
dADP  
dAMP  
dATP  
dCDP  
dCMP  
dCTP  
Deamino-NAD+  
Decanoyl-[acp]  
Dephospho-CoA  
D-erythro-1-(Imidazol-4-yl)glycerol 3-phosphate  
D-Erythrose 4-phosphate  
D-Fructose  
D-Fructose 1,6-bisphosphate  
D-Fructose 1-phosphate  
D-Fructose 6-phosphate  
D-Galactose  
dGDP  
D-Gluconic acid  
D-Glucono-1,5-lactone 6-phosphate  
D-Glucosamine  
D-Glucosamine 6-phosphate  
D-Glucose  
D-Glucose 1-phosphate  
D-Glucose 6-phosphate  
D-Glyceraldehyde  
D-Glyceraldehyde 3-phosphate  
D-Glycerate  
dGMP  
dGTP  
Dihydrofolate  
Dihydropteroate  
Dimethylallyl diphosphate  
Diphosphate  
DL-Glutamate  
D-myo-Inositol 1,4,5-trisphosphate  
Dodecanoyl-[acyl-carrier protein]  
D-Ribose  
D-Ribose 5-phosphate  
D-Ribulose 5-phosphate  
D-Serine  
D-Sorbitol  
dTDP  
dTMP  
dTTP  
dUDP  
dUMP  
dUTP  
D-Xylose

---

D-Xylulose  
D-Xylulose 5-phosphate  
Ethanol  
Ethanolamine  
Ethanolamine phosphate  
FAD  
FADH2  
FMN  
Folate  
Formamidopyrimidine nucleoside triphosphate  
Formate  
Formylanthranilate  
Fumarate  
Galactitol  
gamma-L-Glutamyl-L-cysteine  
GDP  
Geranyl diphosphate  
Geranylgeranyl diphosphate  
Glutaminyl-tRNA  
Glutaryl-CoA  
Glutathione  
Glutathione disulfide  
Glycerol  
Glycerone  
Glycerone phosphate  
Glycine  
Glycolaldehyde  
Glycolate  
Glycyl-tRNA  
Glyoxylate  
GMP  
GTP  
Guanine  
Guanosine  
H<sup>+</sup>  
H<sub>2</sub>O  
HCO<sub>3</sub><sup>-</sup>  
Hexadecanal  
Hexadecanoic acid  
Hexadecanoyl-[acp]  
Hexanoyl-[acp]  
Homocitrate  
Hydrogen peroxide  
Hydrogen sulfide  
Hydroxymethylbilane  
Hydroxypyruvate  
Hypoxanthine  
IMP  
Indole  
Indoleglycerol phosphate  
Inosine  
Isocitrate  
Isopentenyl diphosphate  
L-2-Aminoadipate  
L-2-Aminoadipate 6-semialdehyde  
L-2-Aminoadipate adenylate  
L-3,4-Dihydroxybutan-2-one 4-phosphate  
L-Alanine  
L-Alanyl-tRNA  
L-Allothreonine

---

Lanosterol  
L-Arginine  
L-Arginyl-tRNA  
L-Asparagine  
L-Asparaginyl-tRNA  
L-Aspartate  
L-Aspartate 4-semialdehyde  
L-Aspartyl-tRNA  
L-Citrulline  
L-Cystathionine  
L-Cysteine  
L-Cysteinyl-tRNA  
L-Formylkynurenine  
L-Glutamate  
L-Glutamate 5-semialdehyde  
L-Glutamine  
L-Glutamyl 5-phosphate  
L-Glutamyl-tRNA  
L-Histidinal  
L-Histidine  
L-Histidinol  
L-Histidinol phosphate  
L-Histidyl-tRNA  
L-Homocysteine  
L-Homoserine  
L-Isoleucine  
L-Isoleucyl-tRNA  
L-Kynurenine  
L-Lysine  
L-Lysyl-tRNA  
L-Ornithine  
L-Phenylalanine  
L-Phenylalanyl-tRNA  
L-Proline  
L-Prolyl-tRNA  
L-Selenocystathionine  
L-Selenocysteine  
L-Serine  
L-Seryl-tRNA  
L-Threonine  
L-Threonyl-tRNA  
L-Tryptophan  
L-Tryptophanyl-tRNA  
L-Tyrosine  
L-Tyrosyl-tRNA  
L-Valine  
L-Valyl-tRNA  
Malonyl-[acyl-carrier protein]  
Malonyl-CoA  
Maltose  
Mannitol  
Mercaptopyruvate  
myo-Inositol  
myo-Inositol 4-phosphate  
N-(5'-Phospho-D-1'-riboseylformimino)-5-amino-1-(5''-phospho-D-riboseyl)-4-imidazolecarboxamide  
N-(5-Phospho-D-riboseyl)anthranilate  
N-(L-Arginino)succinate  
N6-(1,2-Dicarboxyethyl)-AMP  
N6-(L-1,3-Dicarboxypropyl)-L-lysine  
N-Acetyl-alpha-D-glucosamine 1-phosphate

---

N-Acetyl-D-glucosamine 6-phosphate  
N-Acetyl-L-glutamate  
N-Acetyl-L-glutamate 5-phosphate  
N-Acetyl-L-glutamate 5-semialdehyde  
N-Acetylmethionine  
NAD+  
NADH  
NADP+  
NADPH  
N-Carbamoyl-L-aspartate  
NH<sub>3</sub>  
Nicotinamide  
Nicotinamide D-ribonucleotide  
Nicotinate  
Nicotinate D-ribonucleoside  
Nicotinate D-ribonucleotide  
N-Ribosylmethionine  
O<sub>2</sub>-  
O-Acetylcarnitine  
O-Acetyl-L-homoserine  
O-Acetyl-L-serine  
Octadecanoic acid  
Octanoyl-[acp]  
Oleoyl-CoA  
O-Phospho-L-homoserine  
O-Phospho-L-serine  
Orotate  
Orotidine 5'-phosphate  
Orthophosphate  
O-Succinyl-L-homoserine  
Oxaloacetate  
Oxaloglutarate  
Oxalosuccinate  
Oxygen  
P1,P4-Bis(5'-adenosyl) tetraphosphate  
Palmitoyl-CoA  
Pantothine 4'-phosphate  
Pantothenate  
Phenylacetaldehyde  
Phenylacetic acid  
Phenylpyruvate  
Phosphoenolpyruvate  
Phosphoribosyl-AMP  
Phytosphingosine  
Porphobilinogen  
Prephenate  
Presqualene diphosphate  
Protoporphyrin  
Protoporphyrinogen IX  
Pseudouridine 5'-phosphate  
Putrescine  
Pyridoxal  
Pyridoxal phosphate  
Pyridoxamine  
Pyridoxamine phosphate  
Pyridoxine  
Pyridoxine phosphate  
Pyruvate  
Quinolate  
Riboflavin

---

S-(Hydroxymethyl)glutathione  
S-Adenosyl-L-homocysteine  
Se-Adenosyl-L-selenohomocysteine  
Sedoheptulose 1,7-bisphosphate  
Sedoheptulose 7-phosphate  
Selenide  
Selenite  
Selenohomocysteine  
S-Formylglutathione  
Shikimate  
Shikimate 3-phosphate  
sn-glycero-3-Phosphoethanolamine  
sn-Glycerol 3-phosphate  
Sphinganine  
Sphinganine 1-phosphate  
Squalene  
S-Sulfo-L-cysteine  
Starch  
Stearoyl-CoA  
Succinate  
Succinate semialdehyde  
Succinyl-CoA  
Sucrose  
Sucrose 6-phosphate  
Sulfate  
Sulfite  
Tetradecanoyl-[acp]  
Tetrahydrofolate  
Tetrahydrofolyl-[Glu](2)  
Thiamin diphosphate  
Thiamin triphosphate  
Thiamine  
Thiosulfate  
trans,trans-Farnesyl diphosphate  
trans-Dec-2-enoyl-[acp]  
trans-Dodec-2-enoyl-[acp]  
trans-Hex-2-enoyl-[acp]  
trans-Hexadec-2-enoyl-[acp]  
trans-Hexadec-2-enoyl-CoA  
trans-Oct-2-enoyl-[acp]  
trans-Tetradec-2-enoyl-[acp]  
Trehalose 6-phosphate  
tRNA  
tRNA containing 6-isopentenyladenosine  
UDP  
UDP-D-galactose  
UDP-glucose  
UDP-N-acetyl-D-glucosamine  
UMP  
Uracil  
Urea  
Urea-1-carboxylate  
Uridine  
Uroporphyrinogen III  
UTP  
Xanthine  
Xanthosine  
Xanthosine 5'-phosphate  
Xylitol

---



## References

1. McDonald PN (2001) Two-hybrid systems. Methods and protocols. Introduction. Methods Mol Biol 177: v-viii.
