# Supplementary material for: The RAVEN Toolbox and Its Use for Generating a Genome-scale Metabolic Model for Penicillium chrysogenum
Source: PubMed Central journal article supplement (PMC3605104; doi:10.1371/journal.pcbi.1002980), 2013-03-21
Supplement: pcbi.1002980.s007.pdf [file pcbi.1002980.s007.pdf]

**Table S4.** New metabolites which could be synthesized in the automatically reconstructed *S. cerevisiae* model from minimal media after gap-filling. These metabolites were all present in the model before the addition of new reactions.

---

| <b>KEGG metabolite name</b>                 |
|---------------------------------------------|
| (R)-Lactate                                 |
| (R)-S-Lactoylglutathione                    |
| (S)-Lactate                                 |
| (S)-Methylmalonyl-CoA                       |
| (Z)-But-2-ene-1,2,3-tricarboxylate          |
| 1,2-Dihydroxy-5-(methylthio)pent-1-en-3-one |
| 2,3-Diketo-5-methylthiopentyl-1-phosphate   |
| 24-Methylenecycloartanol                    |
| 2-Deoxy-D-ribose 1-phosphate                |
| 2-Deoxy-scylo-inosamine                     |
| 2-Deoxy-scylo-inosose                       |
| 2-Methylacetoacetyl-CoA                     |
| 2-Methylcitrate                             |
| 2-Oxoglutaramate                            |
| 3-(Methylthio)propionic acid                |
| 3-Aminopropanal                             |
| 3-Cyano-L-alanine                           |
| 3-Sulfinio-L-alanine                        |
| 3-Sulfinylpyruvate                          |
| 3-Sulfopyruvate                             |
| 4-Aminobutyraldehyde                        |
| 4-Coumarate                                 |
| 4-Hydroxystyrene                            |
| 4-Methyl-2-oxopentanoate                    |
| 4-Methylthio-2-oxobutanoic acid             |
| 5-Hydroxyconiferyl alcohol                  |
| 5-Hydroxy-guaiacyl lignin                   |
| 5'-Methylthioadenosine                      |
| ADP-ribose                                  |
| alpha-Aminopropionitrile                    |
| Aminoacetaldehyde                           |
| beta-D-Fructose 2-phosphate                 |
| Betaine                                     |
| Betaine aldehyde                            |
| Caffeic aldehyde                            |
| Caffeoyl-CoA                                |
| CDP-choline                                 |
| Choline                                     |
| Choline phosphate                           |
| CO                                          |
| Coniferyl alcohol                           |
| Coniferyl aldehyde                          |
| Cyanide                                     |
| Deoxyadenosine                              |
| Deoxycytidine                               |
| Deoxyguanosine                              |
| Deoxyinosine                                |
| Deoxyuridine                                |
| Ferulate                                    |
| gamma-Amino-gamma-cyanobutanoate            |
| gamma-Glutamyl-beta-cyanoalanine            |
| Guaiacyl lignin                             |
| Hydrogen cyanide                            |
| Hypotaurine                                 |
| Inositol 1-phosphate                        |
| Lactaldehyde                                |

---

L-Arogenate  
L-Cysteate  
L-Leucine  
L-Leucyl-tRNA  
L-Methionine  
L-Methionyl-tRNA  
L-Selenomethionine  
Methaneselenol  
Methylglyoxal  
Methylselenopyruvate  
N-Formylmethionyl-tRNA  
p-Coumaroyl-CoA  
Precorrin 2  
Propanal  
Propane-1,2-diol  
Propanoate  
Propanoyl-CoA  
Propionyladenylate  
S-Adenosyl-L-methionine  
S-Adenosylmethioninamine  
Se-Adenosylselenomethionine  
Selenomethionyl-tRNA  
Se-Methyl-L-selenocysteine  
Sinapate  
Sinapoyl aldehyde  
Sinapyl alcohol  
Sirohydrochlorin  
S-Methyl-5-thio-D-ribose 1-phosphate  
S-Methyl-5-thio-D-ribulose 1-phosphate  
sn-glycero-3-Phosphocholine  
Spermidine  
Spermine  
Syringyl lignin  
Taurine  
Thiocyanate

---
