# Supplementary material for: The RAVEN Toolbox and Its Use for Generating a Genome-scale Metabolic Model for Penicillium chrysogenum
Source: PubMed Central journal article supplement (PMC3605104; doi:10.1371/journal.pcbi.1002980), 2013-03-21
Supplement: pcbi.1002980.s008.pdf [file pcbi.1002980.s008.pdf]

**Table S5.** Reactions which were added to the automatically reconstructed *S. cerevisiae* model by *fillGaps*. Out of the 45 added reactions 17 has evidence to support that they should be included in the model, 9 has inconclusive of missing evidence, and 19 should not have been included in the model.

| KEGG reaction | EC number | Correctly added | Exists in iIN800                    | Comments                                                                                                                                      |
|---------------|-----------|-----------------|-------------------------------------|-----------------------------------------------------------------------------------------------------------------------------------------------|
| R00931        | 2.3.3.5   | Yes             | Yes, but only as a citrate synthase | YPR001W has methylcitrate synthase ability in addition to citrate synthase according to SGD                                                   |
| R02054        | 3.1.1.32  | Yes             | No                                  | YOR022C has been suggested to have phospholipase A1 ability according to SGD                                                                  |
| R01016        | 4.2.3.3   | Yes             | No                                  | Methylglyoxal synthase exists in <i>S. cerevisiae</i> [1]                                                                                     |
| R02744        | 3.1.1.5   | Yes             | Yes                                 | Lysophospholipase exist according to SGD. YMR008C, YOL011W and YMR006C were previously in iIN800 but not in automatically reconstructed model |
| R01664        | 3.1.3.5   | Yes             | Yes, but without associated genes   | 5'-nucleotidases exist according to BRENDA. YOR155C is a possible gene, but might be specific to IMP                                          |
| R02730        | 3.1.3.54  | Yes             | No                                  | Fructose-2,6-bisphosphate 6-phosphatase does not have an associated KO in KEGG, but the reference points to <i>S. cerevisiae</i>              |
| R01650        | 1.5.3.11  | Yes             | Yes, but without associated genes   | YMR020W is the <i>S. cerevisiae</i> polyamine oxidase                                                                                         |
| R01598        | 6.2.1.3   | Yes             | Yes                                 | The reaction could be carried out by long-chain fatty acid-coa ligase which is already in the model                                           |
| R00946        | 2.1.1.13  | Yes             | Yes, but without associated genes   | YER091C is a cobalamin independent version (2.1.1.14)                                                                                         |
| R04861        | -         | Yes             | No                                  | Spontaneous                                                                                                                                   |
| R08361        | -         | Yes             | No                                  | Spontaneous                                                                                                                                   |
| R04931        | 2.1.1.9   | Yes             | No                                  | YMR209C is a putative S-                                                                                                                      |

|        |          |           |                                                                       |  |                                                                                                                                                                                                |
|--------|----------|-----------|-----------------------------------------------------------------------|--|------------------------------------------------------------------------------------------------------------------------------------------------------------------------------------------------|
|        |          |           |                                                                       |  | adenosylmethionine-dependent methyltransferase that matches according to SGD                                                                                                                   |
| R01320 | 2.1.1.71 | Yes       | No, but the responsible gene is present (but for the wrong EC number) |  | YJR073C is a hosphatidyl-N-methylethanolamine N-methyltransferase according to SGD                                                                                                             |
| R03424 | 2.1.1.71 | Yes       | No, but the responsible gene is present (but for the wrong EC number) |  | YJR073C is a hosphatidyl-N-methylethanolamine N-methyltransferase according to SGD                                                                                                             |
| R01731 | 2.6.1.57 | Yes       | Yes, with unclear EC numbers but the correct gene (YGL202W)           |  | The gene also exists in the automatically reconstructed model, but was mapped to some other amino acid transferases                                                                            |
| R09097 | -        | Yes       | Yes                                                                   |  | Propionaldehyde dehydrogenase function exists according to SGD. The general aldehyde dehydrogenases YMR170C, YMR169C, YOR374W, YER073W, YPL061W exists in the model but not with this reaction |
| R00544 | -        | Yes       | Yes                                                                   |  | Propionaldehyde dehydrogenase function exists according to SGD. The general aldehyde dehydrogenases YMR170C, YMR169C, YOR374W, YER073W, YPL061W exists in the model but not with this reaction |
| R00102 | 3.2.2.5  | Uncertain | Yes, but without associated genes                                     |  | Could not find any other evidence                                                                                                                                                              |
| R04443 | -        | Uncertain |                                                                       |  | no KO/EC                                                                                                                                                                                       |
| R07383 | -        | Uncertain |                                                                       |  | no KO/EC                                                                                                                                                                                       |
| R03714 | -        | Uncertain |                                                                       |  | no KO/EC                                                                                                                                                                                       |
| R01410 | -        | Uncertain |                                                                       |  | unknown reaction                                                                                                                                                                               |
| R08890 | 2.6.1.-  | Uncertain | Yes, but with uncomplete EC number                                    |  | Unclear whether the reaction could be carried out by the same enzyme which is used                                                                                                             |

|        |           |           |                                          |                                                                                                                                                                          |
|--------|-----------|-----------|------------------------------------------|--------------------------------------------------------------------------------------------------------------------------------------------------------------------------|
| R02434 | -         | Uncertain |                                          | in iIN800<br>no KO/EC                                                                                                                                                    |
| R08714 | 2.6.1.-   | Uncertain | Yes, but with<br>uncomplete EC<br>number | Unclear whether the<br>reaction could be<br>carried out by the same<br>enzyme which is used<br>in iIN800                                                                 |
| R03185 | -         | Uncertain |                                          | No EC number in<br>KEGG, but YKR076W<br>and YGR154C are<br>associated to the GO<br>term "glutathione<br>dehydrogenase<br>(ascorbate) activity"<br>that fits the reaction |
| R04330 | 1.1.53    | No        | No                                       |                                                                                                                                                                          |
| R00095 | 1.6.5.4   | No        | No                                       |                                                                                                                                                                          |
| R08617 | 4.2.3.-   | No        | No                                       |                                                                                                                                                                          |
| R01267 | 4.2.1.65  | No        | No                                       |                                                                                                                                                                          |
| R07409 | 1.14.15.7 | No        | No                                       |                                                                                                                                                                          |
| R01182 | 2.7.1.64  | No        | No                                       |                                                                                                                                                                          |
| R00737 | 4.3.1.23  | No        | No                                       |                                                                                                                                                                          |
| R02593 | 1.1.1.195 | No        | No                                       |                                                                                                                                                                          |
| R03918 | 1.1.1.195 | No        | No                                       |                                                                                                                                                                          |
| R06573 | 1.14.13.- | No        | No                                       |                                                                                                                                                                          |
| R06574 | 2.1.1.68  | No        | No                                       |                                                                                                                                                                          |
| R06577 | 2.1.1.68  | No        | No                                       |                                                                                                                                                                          |
| R01616 | 6.2.1.12  | No        | No                                       |                                                                                                                                                                          |
| R03524 | 4.4.1.9   | No        | No                                       |                                                                                                                                                                          |
| R02376 | 4.2.1.28  | No        | No                                       |                                                                                                                                                                          |
| R01941 | 1.2.1.44  | No        | No                                       |                                                                                                                                                                          |
| R01945 | 2.3.1.99  | No        | No                                       |                                                                                                                                                                          |
| R04342 | 2.3.1.133 | No        | No                                       |                                                                                                                                                                          |
| R07432 | 2.3.1.133 | No        | No                                       |                                                                                                                                                                          |

## References

1. Murata K, Fukuda Y, Watanabe K, Saikusa T, Shimosaka M, et al. (1985) Characterization of methylglyoxal synthase in *Saccharomyces cerevisiae*. *Biochem Biophys Res Commun* 131: 190-198.
