# Supplementary material for: The RAVEN Toolbox and Its Use for Generating a Genome-scale Metabolic Model for Penicillium chrysogenum
Source: PubMed Central journal article supplement (PMC3605104; doi:10.1371/journal.pcbi.1002980), 2013-03-21
Supplement: pcbi.1002980.s009.pdf [file pcbi.1002980.s009.pdf]

**Table S6.** Genes where their corresponding reactions were localized to the mitochondria after running *predictLocalization* (transport cost=0.1). The color indicates whether the gene product is mitochondrial in SGD, where green means that it does, yellow that it is unclear, and red that it does not.

| In common | Comments | Only in automatically reconstructed | Comments      | Only in iIN800 | Comments      |
|-----------|----------|-------------------------------------|---------------|----------------|---------------|
| YAR035W   |          | YBL098W                             |               | YBR029C        |               |
| YBL013W   |          | YBR003W                             |               | YCR024C        |               |
| YBR026C   |          | YCL064C                             |               | YDL182W        |               |
| YBR084W   |          | YDL168W                             |               | YDR236C        |               |
| YBR263W   |          | YDR538W                             |               | YER073W        |               |
| YCL004W   |          | YGR094W                             |               | YGL125W        |               |
| YDL066W   |          | YHL032C                             |               | YGR012W        |               |
| YDL142C   |          | YHR091C                             |               | YJL200C        |               |
| YDL174C   |          | YHR190W                             |               | YKL085W        |               |
| YDR019C   |          | YIL066C                             |               | YLR304C        |               |
| YDR232W   |          | YKL067W                             |               | YMR062C        |               |
| YDR234W   |          | YKL182W                             |               | YMR207C        |               |
| YDR268W   |          | YLR100W                             |               | YOR040W        |               |
| YER014W   |          | YLR305C                             |               | YOR374W        |               |
| YER061C   |          | YML042W                             |               | YPL188W        |               |
| YER069W   |          | YMR293C                             |               | YEL041W        | unknown       |
| YER086W   |          | YOL059W                             |               | YLR209C        | intracellular |
| YER087W   |          | YOR241W                             |               | YPL023C        | unknown       |
| YER170W   |          | YPL091W                             |               | YER026C        |               |
| YER178W   |          | YPR006C                             |               | YFL022C        |               |
| YFL018C   |          | YPR033C                             |               | YFR047C        |               |
| YGR171C   |          | YPR113W                             |               | YGL037C        |               |
| YGR244C   |          | YHR128W                             | intracellular | YHR074W        |               |
| YGR255C   |          | YKR069W                             | intracellular | YJR049C        |               |
| YHR037W   |          | YOL064C                             | unknown       | YKL216W        |               |
| YHR106W   |          | YBR020W                             |               | YLR060W        |               |
| YHR208W   |          | YBR205W                             |               | YLR328W        |               |
| YIL094C   |          | YBR218C                             |               | YOL097C        |               |
| YIL125W   |          | YBR252W                             |               | YOR209C        |               |
| YIL155C   |          | YCR053W                             |               | YOR236W        |               |
| YJR016C   |          | YDL021W                             |               | YBR029C        |               |
| YKL029C   |          | YDL022W                             |               |                |               |
| YKL106W   |          | YDR047W                             |               |                |               |
| YKL141W   |          | YDR297W                             |               |                |               |
| YKL194C   |          | YDR454C                             |               |                |               |
| YLR089C   |          | YER070W                             |               |                |               |
| YLR142W   |          | YFL001W                             |               |                |               |
| YLR355C   |          | YGL001C                             |               |                |               |
| YLR382C   |          | YGL012W                             |               |                |               |
| YML054C   |          | YGR060W                             |               |                |               |
| YML110C   |          | YGR087C                             |               |                |               |
| YMR083W   |          | YGR175C                             |               |                |               |
| YMR108W   |          | YHR063C                             |               |                |               |
| YMR189W   |          | YIL145C                             |               |                |               |
| YNL037C   |          | YJL068C                             |               |                |               |
| YNL071W   |          | YJR078W                             |               |                |               |
| YNL073W   |          | YKL001C                             |               |                |               |
| YNL104C   |          | YKL008C                             |               |                |               |
| YNL169C   |          | YKR009C                             |               |                |               |
| YNR001C   |          | YLR027C                             |               |                |               |
| YOL033W   |          | YLR058C                             |               |                |               |
| YOL096C   |          | YLR303W                             |               |                |               |
| YOL140W   |          | YMR015C                             |               |                |               |

YOR142W  
YOR176W  
YPL040C  
YPL097W  
YPL104W  
YPL262W  
YPR001W  
YPR047W

YMR113W  
YMR250W

---
