# Supplementary material for: The RAVEN Toolbox and Its Use for Generating a Genome-scale Metabolic Model for Penicillium chrysogenum
Source: PubMed Central journal article supplement (PMC3605104; doi:10.1371/journal.pcbi.1002980), 2013-03-21
Supplement: pcbi.1002980.s010.pdf [file pcbi.1002980.s010.pdf]

**Table S7.** Reactions which cannot carry flux even when all uptake reactions are unconstrained.

---

| <b>Reaction ID</b> | <b>Description</b>                                                                                                                         |
|--------------------|--------------------------------------------------------------------------------------------------------------------------------------------|
| r0071              | 1-aminocyclopropane-1-carboxylate aminohydrolase (isomerizing)                                                                             |
| r0108              | tartrate dehydrogenase                                                                                                                     |
| r0161              | beta-glucuronidase                                                                                                                         |
| r0162              | 2-deoxy-D-gluconate:NAD <sup>+</sup> 3-oxidoreductase                                                                                      |
| r0174              | UDP-glucuronosyltransferase                                                                                                                |
| r0213              | poly(1,4-alpha-D-galacturonide) galacturonohydrolase                                                                                       |
| r0240              | lactose galactohydrolase                                                                                                                   |
| r0356              | ADP-ribose ribophosphohydrolase                                                                                                            |
| r0405              | guanosine 3'-diphosphate 5'-triphosphate 5'-phosphohydrolase                                                                               |
| r0453              | ATP:NADH 2'-phosphotransferase                                                                                                             |
| r0454              | NAD <sup>+</sup> phosphohydrolase                                                                                                          |
| r0514              | L-cysteine:[ThiI] sulfurtransferase                                                                                                        |
| r0515              | ATP:4-amino-2-methyl-5-phosphomethylpyrimidine phosphotransferase                                                                          |
| r0516              | ATP:4-methyl-5-(2-hydroxyethyl)-thiazole 2-phosphotransferase                                                                              |
| r0517              | 2-methyl-4-amino-5-hydroxymethylpyrimidine-diphosphate:4-methyl-5-(2-phosphoethyl)-thiazole 2-methyl-4-aminopyridine-5-methenyltransferase |
| r0534              | myo-Inositol-hexakisphosphate 3-phosphohydrolase                                                                                           |
| r0573              | agmatine amidohydrolase                                                                                                                    |
| r0577              | delta-1-pyrroline-5-carboxylate dehydrogenase                                                                                              |
| r0580              | pyrroline-5-carboxylate reductase                                                                                                          |
| r0581              | trans-4-hydroxy-L-proline:NAD <sup>+</sup> 5-oxidoreductase                                                                                |
| r0597              | 5-methyltetrahydropteroyltri-L-glutamate:L-homocysteine S-methyltransferase                                                                |
| r0602              | O-succinyl-L-homoserine succinate-lyase (adding cysteine)                                                                                  |
| r0603              | O-succinyl-L-homoserine succinate-lyase (deaminating; 2-oxobutanoate-forming)                                                              |
| r0604              | O-succinyl-L-homoserine succinate-lyase (adding hydrogen sulfide)                                                                          |
| r0630              | N,N-dimethylglycine oxidase                                                                                                                |
| r0631              | sarcosine:oxygen oxidoreductase (demethylating)                                                                                            |
| r0726              | Indole-3-acetamide amidohydrolase                                                                                                          |
| r0732              | phenylethylalcohol:NAD <sup>+</sup> oxidoreductase                                                                                         |
| r0752              | 3-indoleacetonitrile aminohydrolase                                                                                                        |
| r0754              | indole-3-acetamide hydro-lyase                                                                                                             |

---
