# Supplementary material for: The RAVEN Toolbox and Its Use for Generating a Genome-scale Metabolic Model for Penicillium chrysogenum
Source: PubMed Central journal article supplement (PMC3605104; doi:10.1371/journal.pcbi.1002980), 2013-03-21
Supplement: pcbi.1002980.s011.pdf [file pcbi.1002980.s011.pdf]

**Table S8.** Comparison of metabolic models.

| <b>Organism</b> | <b>Model name</b> | <b>Metabolic genes</b> | <b>Metabolites<sup>a</sup></b> | <b>Unique metabolic reactions<sup>b</sup></b> | <b>References</b> |
|-----------------|-------------------|------------------------|--------------------------------|-----------------------------------------------|-------------------|
| A. nidulans     | iHD666            | 666                    | 543 (740)                      | 789                                           | [1]               |
| A. niger        | iMA871            | 871                    | 782 (1047)                     | 1194                                          | [2]               |
| A. oryzae       | iWV1314           | 1314                   | 808 (1102)                     | 1243                                          | [3]               |
| P. chrysogenum  | iAL1006           | 1006                   | 849 (1235)                     | 1471                                          | This study        |

<sup>a</sup>Number of chemically distinct metabolites, not counting presence in multiple compartments. Metabolite number in parenthesis counting presence in multiple compartment

<sup>b</sup>Unique reactions are defined as reactions being biochemically unique in their own compartment or transport reactions. Isoenzymes are not included in this number. Exchange reactions are not included in this number.

## References

1. David H, Ozcelik IS, Hofmann G, Nielsen J (2008) Analysis of *Aspergillus nidulans* metabolism at the genome-scale. *BMC Genomics* 9: 163.
2. Andersen MR, Nielsen ML, Nielsen J (2008) Metabolic model integration of the bibliome, genome, metabolome and reactome of *Aspergillus niger*. *Mol Syst Biol* 4: 178.
3. Vongsangnak W, Olsen P, Hansen K, Krogsgaard S, Nielsen J (2008) Improved annotation through genome-scale metabolic modeling of *Aspergillus oryzae*. *BMC Genomics* 9: 245.
