# Supplementary material for: The RAVEN Toolbox and Its Use for Generating a Genome-scale Metabolic Model for Penicillium chrysogenum
Source: PubMed Central journal article supplement (PMC3605104; doi:10.1371/journal.pcbi.1002980), 2013-03-21
Supplement: pcbi.1002980.s012.pdf [file pcbi.1002980.s012.pdf]

**Table S9.** Biomass composition calculations for *P. chrysogenum*.

**\*BIOMASS COMPOSITION (g/gDW)**

|                              |       |
|------------------------------|-------|
| Protein                      | 0.45  |
| RNA                          | 0.08  |
| DNA                          | 0.01  |
| Phospholipids                | 0.035 |
| Sterolesters                 | 0.01  |
| Triacylglycerol <sup>b</sup> | 0.005 |
| Cell wall                    | 0.22  |
| Glycogen                     | 0.03  |
| Free amino acids             | 0.04  |
| Free nucleotides             | 0.02  |
| Metabolites                  | 0.02  |

<sup>a</sup>If nothing else is stated the composition is taken from Table 4.13 in Physiological Engineering Aspects of Penicillin chrysogenum [1]

<sup>b</sup>This proportion is assumed to contain mono-, di-, and triacylglycerides as well as free fatty acids

**AMINO ACIDS AND PROTEIN**

|                           | Molecular weight (g/mol) | Protein composition (mol/mol amino acids) <sup>a</sup> | Scaled protein composition (mol/mol amino acids) <sup>d</sup> | Protein composition (mmol/g protein) | Free amino acid pool (mol/mol free amino acids) <sup>e,f</sup> | Scaled free amino acid composition (mol/mol free amino acids) <sup>d</sup> | Amino acid pool composition (mmol/g free amino acids) |
|---------------------------|--------------------------|--------------------------------------------------------|---------------------------------------------------------------|--------------------------------------|----------------------------------------------------------------|----------------------------------------------------------------------------|-------------------------------------------------------|
| L-alanine                 | 89.09                    | 0.071                                                  | 0.071753411                                                   | 0.583943653                          | 0.13                                                           | 0.1363398                                                                  | 1.04484604                                            |
| L-2-aminoadipate          | 161.15                   | 0                                                      | 0                                                             | 0                                    | 0.006                                                          | 0.00629261                                                                 | 0.04822366                                            |
| L-arginine                | 174.2                    | 0.0675                                                 | 0.068216271                                                   | 0.555157698                          | 0.026                                                          | 0.02726796                                                                 | 0.20896921                                            |
| L-asparagine <sup>b</sup> | 132.12                   | 0.017125                                               | 0.017306721                                                   | 0.140845564                          | 0.034                                                          | 0.0356581                                                                  | 0.27326743                                            |
| L-aspartate <sup>b</sup>  | 133.11                   | 0.051375                                               | 0.051920162                                                   | 0.422536693                          | 0.058                                                          | 0.06082853                                                                 | 0.46616208                                            |
| L-cysteine                | 121.16                   | 0.018                                                  | 0.018191006                                                   | 0.148042053                          | 0.005                                                          | 0.00524384                                                                 | 0.04018639                                            |
| L-glutamate <sup>c</sup>  | 147.13                   | 0.088125                                               | 0.089060131                                                   | 0.724789217                          | 0.254                                                          | 0.266387                                                                   | 2.04146841                                            |
| L-glutamine <sup>c</sup>  | 146.15                   | 0.029375                                               | 0.02968671                                                    | 0.241596406                          | 0.166                                                          | 0.17409544                                                                 | 1.33418802                                            |
| glycine                   | 75.07                    | 0.0755                                                 | 0.076301162                                                   | 0.620954166                          | 0.032                                                          | 0.03356057                                                                 | 0.25719287                                            |
| L-histidine               | 155.16                   | 0.025                                                  | 0.025265285                                                   | 0.205613962                          | 0.028                                                          | 0.0293655                                                                  | 0.22504376                                            |
| L-isoleucine              | 131.18                   | 0.042                                                  | 0.04244568                                                    | 0.345431457                          | 0.013                                                          | 0.01363398                                                                 | 0.1044846                                             |
| L-leucine                 | 131.18                   | 0.0845                                                 | 0.085396665                                                   | 0.694975193                          | 0.016                                                          | 0.01678028                                                                 | 0.12859644                                            |
| L-lysine                  | 146.19                   | 0.0755                                                 | 0.076301162                                                   | 0.620954166                          | 0.022                                                          | 0.02307289                                                                 | 0.1768201                                             |

|                 |        |        |             |             |        |            |            |
|-----------------|--------|--------|-------------|-------------|--------|------------|------------|
| L-methionine    | 149.21 | 0.054  | 0.054573017 | 0.444126159 | 0.005  | 0.00524384 | 0.04018639 |
| L-phenylalanine | 165.19 | 0.0335 | 0.033855483 | 0.27552271  | 0.005  | 0.00524384 | 0.04018639 |
| L-proline       | 115.13 | 0.0515 | 0.052046488 | 0.423564762 | 0.0515 | 0.05401154 | 0.41391978 |
| L-serine        | 105.09 | 0.0515 | 0.052046488 | 0.423564762 | 0.047  | 0.04929208 | 0.37775203 |
| L-threonine     | 119.12 | 0.0535 | 0.054067711 | 0.440013879 | 0.031  | 0.0325118  | 0.24915559 |
| L-tryptophan    | 204.23 | 0.007  | 0.00707428  | 0.057571909 | 0.002  | 0.00209754 | 0.01607455 |
| L-tyrosine      | 118.19 | 0.0235 | 0.023749368 | 0.193277125 | 0.006  | 0.00629261 | 0.04822366 |
| L-valine        | 117.15 | 0.07   | 0.070742799 | 0.575719094 | 0.016  | 0.01678028 | 0.12859644 |
| <b>TOTAL</b>    |        | 0.9895 | 1           |             | 0.9535 | 1          |            |

Molecular weight of protein (g/mol) 122.8772852

Molecular weight of free amino acid pool (g/mol) 130.4879339

<sup>a</sup>Data from Table 4.11 in Physiological Engineering Aspects of *Penicillin chrysogenum* [1]. Averaged composition from two studies (Jørgensen 1993;[2])

<sup>b</sup>The pool of aspartate and asparagine is measured. A ratio of 3:1 aspartate/asparagine is assumed (Oura, 1972)

<sup>c</sup>The pool of glutamate and glutamine is measured. A ratio of 3:1 glutamate/glutamine is assumed (Oura, 1972)

<sup>d</sup>Scaled composition to deal with the molecular balance not closing

<sup>e</sup>Data from Table 4.7 in Physiological Engineering Aspects of *Penicillin chrysogenum* [1]. Original data from Jørgensen (1993)

<sup>f</sup>Proline cannot be measured with the applied method. Assumes the same composition as in protein

## DNA AND RNA

|     | RNA composition (mmol/g RNA) <sup>a</sup> |      | DNA composition (mmol/g DNA) <sup>a</sup> |
|-----|-------------------------------------------|------|-------------------------------------------|
| AMP | 0.79                                      | dAMP | 0.79                                      |
| GMP | 0.89                                      | dGMP | 0.86                                      |
| CMP | 0.61                                      | dCMP | 0.86                                      |
| UMP | 0.81                                      | dTMP | 0.79                                      |

<sup>a</sup>Following the reasoning in section 4.3.3 in Physiological Engineering Aspects of *Penicillin chrysogenum* [1]

## FREE RIBONUCLEOTIDES

|     | Free ribonucleotide composition (mmol/g DW) <sup>a</sup> | Molecular weight (g/mol) | Composition (mmol/g free ribonucleotides) |
|-----|----------------------------------------------------------|--------------------------|-------------------------------------------|
| GTP | 0.0033                                                   | 532.18                   | 0.213396447                               |
| ATP | 0.0225                                                   | 507.18                   | 1.454975775                               |
| UTP | 0.00145                                                  | 484.14                   | 0.093765105                               |
| CTP | 0.0033                                                   | 483.16                   | 0.213396447                               |



|                                               |                         |             |             |          |
|-----------------------------------------------|-------------------------|-------------|-------------|----------|
| glucocerebroside 2<br>cardiolipin             | 926.2806<br>1502.506836 | 0.033429704 | 0.043136656 | 0.000024 |
| Molecular weight of<br>phospholipid (g/mol)   | 774.972082              |             |             |          |
| Molecular weight of<br>acylglycerides (g/mol) | 554.6062653             |             |             |          |
| Molecular weight of<br>sterol esters (g/mol)  | 455.9649434             |             |             |          |

<sup>a</sup>Composition calculated only for the acyl chain, not for the fatty acid (lacks the carboxyl group)

<sup>b</sup>Total fatty acid composition for growth on glucose as sole carbon source [3]

<sup>c</sup>Scaled composition to deal with the molecular balance not closing

<sup>d</sup>Assumes the same composition as in the *A. niger* model

<sup>e</sup>No reliable data could be found on the percentage of glucolipids in *Penicillium chrysogenum*. It is therefore assumed that the composition and amount is the same as in *Aspergillus niger* (see the *A. niger* model [4])

<sup>f</sup>The free fatty acid proportion differ between *Penicillium chrysogenum* and *Aspergillus niger* but it is assumed that the proportion relative to the acylglycerides is the same

| <b>CELLWALL AND<br/>STORAGE<sup>a</sup></b>           | Molecular<br>weight of<br>monomer in<br>cell wall<br>(without<br>UDP/GDP)<br>(g/mol) <sup>b</sup> | Cell wall<br>monomer<br>composition<br>(mol/mol total<br>monomers) <sup>b</sup> | Cell wall monomer composition<br>(mmol/g cell wall monomers) |
|-------------------------------------------------------|---------------------------------------------------------------------------------------------------|---------------------------------------------------------------------------------|--------------------------------------------------------------|
| UDP-N-acetyl-D-<br>glucosamine                        | 214.1596                                                                                          | 0.27184466                                                                      | 1.54208087                                                   |
| UDP-glucose                                           | 162.1442                                                                                          | 0.495145631                                                                     | 2.808790156                                                  |
| UDP-D-galactose                                       | 162.1442                                                                                          | 0.145631068                                                                     | 0.826114752                                                  |
| GDP-mannose                                           | 162.1442                                                                                          | 0.058252427                                                                     | 0.330445901                                                  |
| trehalose                                             | 162.1442                                                                                          | 0.029126214                                                                     | 0.16522295                                                   |
| Molecular weight of cell<br>wall and storage (mmol/g) | 176.2843087                                                                                       |                                                                                 |                                                              |

<sup>a</sup>The cell wall composition of *Penicillium chrysogenum* is not well researched and there is conflicting data. The cell wall composition is therefore expressed as a polymerization of the monomers.

<sup>b</sup>Following the reasoning in section 4.3.3 in Physiological Engineering Aspects of *Penicillin chrysogenum* [1]

### **POLYMERISATION COSTS<sup>a</sup>**

|                                 |            |
|---------------------------------|------------|
| DNA                             | 11.22      |
| RNA                             | 7.44       |
| Protein (mmol<br>ATP/g protein) | 34.9942627 |

<sup>a</sup>Following the reasoning in section 4.3.3 in Physiological Engineering Aspects of *Penicillin chrysogenum* [1]

## References

1. Nielsen JH (1995) Physiological engineering aspects of penicillium chrysogenum. Denmark: Polyteknisk forlag. x, 223 p. p.
2. Jaklitsch WM, Hampel W, Rohr M, Kubicek CP, Gamerith G (1986) alpha-Aminoadipate pool concentration and penicillin biosynthesis in strains of Penicillium chrysogenum. Can J Microbiol 32: 473-480.
3. Divakaran P, Modak MJ (1968) Fatty acid composition of mycelium of Penicillium chrysogenum grown in different carbohydrates as a sole source of carbon. Experientia 24: 1102.
4. Andersen MR, Nielsen ML, Nielsen J (2008) Metabolic model integration of the bibliome, genome, metabolome and reactome of Aspergillus niger. Mol Syst Biol 4: 178.
