# Supplementary material for: The RAVEN Toolbox and Its Use for Generating a Genome-scale Metabolic Model for Penicillium chrysogenum
Source: PubMed Central journal article supplement (PMC3605104; doi:10.1371/journal.pcbi.1002980), 2013-03-21
Supplement: pcbi.1002980.s013.pdf [file pcbi.1002980.s013.pdf]

**Table S10.** Reactions with significantly higher flux in DS17690 compared to Wis 54-1255 where the corresponding genes are also up-regulated (as reported by the algorithm by [1]). Ranked by significance ( $p < 0.05$ )

| Reaction ID | Reaction name                                                                    |
|-------------|----------------------------------------------------------------------------------|
| r0601       | O-acetyl-L-homoserine:hydrogen sulfide S-(3-amino-3-carboxypropyl)transferase    |
| r0606       | L-cystathionine cysteine-lyase (deaminating; 2-oxobutanoate-forming)             |
| r0747       | phenylacetate:CoA ligase                                                         |
| r1408       | sulfate permease                                                                 |
| r0648       | L-valine:2-oxoglutarate aminotransferase                                         |
| r0812       | isopenicillin-N synthase                                                         |
| r0622       | L-homoserine:NAD <sup>+</sup> oxidoreductase                                     |
| r1144       | adenosine 3',5'-bisphosphate,sulfite:oxidized-thioredoxin oxidoreductase         |
| r0619       | 3-phosphoserine:2-oxoglutarate aminotransferase                                  |
| r0075       | 2-hydroxybutane-1,2,3-tricarboxylate hydro-lyase                                 |
| r1150       | adenosine 3',5'-bisphosphate 3'-phosphohydrolase                                 |
| r0620       | O-phospho-L-serine phosphohydrolase                                              |
| r0101       | acetyl-CoA:oxaloacetate C-acetyltransferase                                      |
| r0074       | propanoyl-CoA:oxaloacetate C-propanoyltransferase                                |
| r0814       | L-2-aminohexanedioate:L-cysteine:L-valine ligase (AMP-forming, valine-inverting) |
| r0465       | pyruvate:pyruvate acetaldehydetransferase (decarboxylating)                      |
| r0656       | (R)-2,3-dihydroxy-3-methylbutanoate hydro-lyase                                  |
| r0076       | (2S,3R)-3-hydroxybutane-1,2,3-tricarboxylate pyruvate-lyase (succinate-forming)  |
| r0618       | 3-phospho-D-glycerate:NAD <sup>+</sup> 2-oxidoreductase                          |
| r1147       | ATP:adenylylsulfate 3'-phosphotransferase                                        |
| r0374       | ATP:AMP phosphotransferase                                                       |
| r0127       | ubiquinol:ferricytochrome-c oxidoreductase                                       |
| r0546       | L-aspartate-4-semialdehyde:NADP <sup>+</sup> oxidoreductase                      |
| r1317       | ammonium permease                                                                |
| r0128       | H <sup>+</sup> -transporting two-sector ATPase                                   |
| r1149       | hydrogen-sulfide:NADP <sup>+</sup> oxidoreductase                                |
| r0632       | L-serine hydro-lyase (adding homocysteine; L-cystathionine-forming)              |
| r0419       | NADPH:oxidized-thioredoxin oxidoreductase                                        |
| r1155       | ADP:sulfate adenylyltransferase                                                  |
| r0547       | ATP:L-aspartate 4-phosphotransferase                                             |
| r1178       | ADP/ATP/phosphate mitochondrial shuttle                                          |
| r0600       | acetyl-CoA:L-homoserine O-acetyltransferase                                      |
| r0114       | diphosphate phosphohydrolase                                                     |
| r0803       | isopenicillin N amidohydrolase                                                   |
| r0815       | acyl-CoA:6-APA acyltransferase                                                   |
| r0541       | L-aspartate:2-oxoglutarate aminotransferase                                      |

## References

1. Bordel S, Agren R, Nielsen J (2010) Sampling the solution space in genome-scale metabolic networks reveals transcriptional regulation in key enzymes. *PLoS Comput Biol* 6: e1000859.
