# Supplementary material for: The RAVEN Toolbox and Its Use for Generating a Genome-scale Metabolic Model for Penicillium chrysogenum
Source: PubMed Central journal article supplement (PMC3605104; doi:10.1371/journal.pcbi.1002980), 2013-03-21
Supplement: pcbi.1002980.s014.pdf [file pcbi.1002980.s014.pdf]

**Table S11.** Reporter metabolites when comparing the DS17690 and Wis 54-1255 strains [1]. Ranked by significance. Top 40 best scoring metabolites are shown

| <b>Metabolite name</b>                                   | <b>P-value</b> |
|----------------------------------------------------------|----------------|
| N-[L-5-amino-5-carboxypentanoyl]-L-cysteinyl-D-valine[c] | 0 .00292       |
| sulfite[c]                                               | 0 .00387       |
| chitosan[e]                                              | 0 .00795       |
| glutathione[c]                                           | 0 .01265       |
| aminoacetaldehyde[c]                                     | 0 .01458       |
| D-glucosamine[e]                                         | 0 .01651       |
| 1D-myo-inositol 3-phosphate[c]                           | 0 .01842       |
| (S)-1-pyrroline-5-carboxylate[c]                         | 0 .02040       |
| L-1-pyrroline-3-hydroxy-5-carboxylate[c]                 | 0 .02120       |
| phenylacetate[p]                                         | 0 .02120       |
| D-glucosamine 6-phosphate[c]                             | 0 .02121       |
| phenylacetyl-CoA[p]                                      | 0 .02122       |
| ADP[p]                                                   | 0 .02356       |
| phosphate[p]                                             | 0 .02391       |
| D-glucosamine[c]                                         | 0 .02391       |
| taurine[c]                                               | 0 .02717       |
| N-formimidoyl-L-glutamate[c]                             | 0 .02757       |
| maltotriose[c]                                           | 0 .02767       |
| (S)-3-(5-oxo-4,5-dihydro-3H-imidazol-4-yl)propanoate[c]  | 0 .02767       |
| adenosine 3',5'-bisphosphate[c]                          | 0 .02913       |
| L-valine[c]                                              | 0 .02956       |
| succinate semialdehyde[c]                                | 0 .03015       |
| D-galactonate[c]                                         | 0 .03175       |
| carbamate[c]                                             | 0 .03331       |
| cyanate[c]                                               | 0 .03375       |
| 2-dehydro-3-deoxy-D-galactonate[c]                       | 0 .03375       |
| 2-dehydro-3-deoxy-D-gluconate[c]                         | 0 .03462       |
| maltose[c]                                               | 0 .03462       |
| phosphate[c]                                             | 0 .03498       |
| 5-oxo-L-proline[c]                                       | 0 .03580       |
| L-asparagine[c]                                          | 0 .03656       |
| L-glutaminyl-tRNA(Gln)[c]                                | 0 .03718       |
| gamma-L-glutamyl-L-cysteine[c]                           | 0 .03885       |
| L-cysteinylglycine[c]                                    | 0 .04005       |
| R-S-alanylglycine[c]                                     | 0 .04478       |
| phenylacetyl-CoA[c]                                      | 0 .04478       |
| L-isoleucine[c]                                          | 0 .05046       |
| L-isoleucyl-tRNA(Ile)[c]                                 | 0 .05523       |
| L-tyrosine[c]                                            | 0 .05523       |
| thioredoxin disulfide[c]                                 | 0 .05746       |
| thioredoxin dithiol[c]                                   | 0 .05858       |

## References

1. Patil KR, Nielsen J (2005) Uncovering transcriptional regulation of metabolism by using metabolic network topology. *Proc Natl Acad Sci U S A* 102: 2685-2689.
